# Supplementary material for: Genetic control of violacein biosynthesis to enable a pigment-based whole-cell lead biosensor
Source: Royal Society of Chemistry journal article supplement (doi:10.1039/d0ra04815a), 2020-01-01
Supplement: d0ra04815a1.pdf [file d0ra04815a1.pdf]

## Supplementary data

### Genetical control of violacein biosynthesis to enable a pigment-based whole-cell lead biosensor

**Table. S1** Bacterial strains and plasmids used in this study

| Strains, plasmids and Primers | Genotypes or description                                                                                                    | Reference    |
|-------------------------------|-----------------------------------------------------------------------------------------------------------------------------|--------------|
| <b><i>E. coli</i> stains</b>  |                                                                                                                             |              |
| BL21(DE3)pLysS                | F <sup>-</sup> <i>ompT hsdS<sub>B</sub> (r<sub>B</sub><sup>-</sup> m<sub>B</sub><sup>-</sup>) gal dcm</i> (DE3)             | Novagen      |
| TOP10                         | F <sup>-</sup> $\Phi$ 80 <i>lacZ</i> $\Delta$ M15 $\Delta$ <i>lacX74 recA1</i>                                              | Invitrogen   |
| <b>Plasmids</b>               |                                                                                                                             |              |
| pET-21a                       | Amp <sup>R</sup> , T7 promoter, lac operator                                                                                | Novagen      |
| pT-Ppbr                       | T vector carrying <i>pbrR</i> and Ppbr divergent promoter region                                                            | <sup>1</sup> |
| pET-vio                       | pET-21a derivative containing the violacien expression cassette ( <i>vioABCDE</i> ) inserted as a <i>NdeI/SacI</i> fragment | This study   |
| pPpbr-vio                     | pET-vio derivative containing <i>pbrR</i> and Ppbr divergent promoter cloned as a <i>BglII/XbaI</i> fragment                | This study   |
| <b>Primers</b>                |                                                                                                                             |              |
| F-pbr                         | GAAGATCTTTACCCAGATGTTTGA                                                                                                    | This study   |
| R-pbr                         | GCTCTAGAGAGTAACTCCTGAAAATC                                                                                                  | This study   |



**AGATCT**TTACCCAGATGTTTGACTGTTCGTGGCACTTTACCCATGGCAATT  
 GCCCAACCCTTGCAAATGCCGCACGCCTCTACAGATCGAGAGCCAGAA  
 CACTTCTCGCGCAAATCAACCAAGTGCCGTTTTAACTGCAACAGCGCGG  
 ACACACGCATTTCCACCTGTTGAATATGGGCCTCCAGCAGCGTGATGACC  
*pbrR*  
 TCCCCACAGTCCTGCATCGGGTTGTCTCGCAGACCCAGCAATGCGCGAA  
 TCTCGCTCAACGTCATGTCGAGCGAACGGCAATGACGGATGAATTGCAA  
 GCGCTCAATGTGCGCCTCACCGTACAACCGAAAGTTGCCACCGCTTCGC  
 GCTGGCTTTGGCAGTAGCCCTTCTTCTCGTAGTAGCGGATGGTCA  
 CCTCGCACCCAGAGCGCTTGGCGAGGTGCGCAATTCTGATTTCCAT**GCA**  
pbr bidirectional promoter region  
 TCAATCTCCAATTATCACTTGACTCTATAGTGACTATAGAGATTTAATGGA  
 GGCTGAATAGAAGATTTTCAGGAGTACT**TCTAGA**AATAATTTTGTAA  
Violacein expression cassette  
 CTTAAG**AAGGAG**ATATACAT**ATG**—**vioA-vioB-vioC-vioD-vioE**—**TAA****GA**  
**GCTCCGTCGACAAGCTTGC**GGCCGCACTCGAGCACCACCACCACCACC  
 ACTGAGATCCGGCTGCTAACAAAGCCCGAAAGGAAGCTGAGTTGGCTGC  
T7 terminator  
 TGCCACCGCTGAGCAATA**ACTAGCATAACCCCTTGGGGCCTCTAAACGG**  
**GTCTTGAGGGGTTTTTTG**

**Fig. S2 The cloning/expression region of pPpbr-vio used in this study.** DNA sequence and annotation data are all marked. The cassette containing the *pbrR* gene and the divergent *pbr* promoter was inserted in front of the violacein biosynthetic module.

## References

1. Y. Guo, C. Y. Hui, L. Liu, H. Q. Zheng and H. M. Wu, *Frontiers in microbiology*, 2019, **10**, 1454.
